# 1 **A quantitative model for *in vivo* stem cell decisions in planarians**

2 Tamar Frankovits<sup>1</sup>, Prakash Varkey Cherian<sup>1</sup>, Yarden Yasherim<sup>1</sup>, Simon Dobler<sup>1,2</sup>, Omri Wurtzel<sup>1,3</sup>

3

4 <sup>1</sup> The School of Neurobiology, Biochemistry & Biophysics, George S. Wise Faculty of Life Sciences, Tel Aviv  
5 University, Tel Aviv, Israel

6 <sup>2</sup> Present address: Interfaculty Institute of Microbiology and Infection Medicine, University of Tübingen,  
7 Tübingen, Germany

8 <sup>3</sup> Sagol School of Neuroscience, Tel Aviv University, Tel Aviv, Israel

9

10 \* Correspondence: [owurtzel@tauex.tau.ac.il](mailto:owurtzel@tauex.tau.ac.il)

11

## 12 **Abstract**

13 Stem cells contribute to organismal homeostasis by balancing division, self-renewal and differentiation.  
14 Elucidating the strategies by which stem cells achieve this balance is critical for understanding  
15 homeostasis, and for addressing pathogenesis associated with the disruption of this balance (e.g., cancer).  
16 Mathematical models have been developed to distill the principles underlying adult stem cell dynamics in  
17 vertebrates. Yet, valuable insights can be derived from modeling invertebrate stem cell systems that rely  
18 on a fundamentally different strategy. Here, integrating experimental, computational, and analytical  
19 approaches, we develop a quantitative model that reveals basic principles of clonal growth of individual  
20 neoblasts – pluripotent planarian stem cells. Deriving key physiological parameter values from  
21 experimental data, we show that neoblast colony growth can be well described as a straightforward  
22 stochastic decision process, without assuming memory or communication among cells. Crucially, by  
23 experimentally suppressing differentiation to major lineages, we reveal the interplay between colony  
24 growth and lineage decisions. Our findings suggest that neoblasts pre-select their progenitor lineage  
25 based on an underlying cell fate distribution, and that arresting differentiation into specific lineages  
26 disrupts neoblasts' proliferative capacity – without inducing compensatory expression of other lineages.  
27 Our findings uncover essential aspects of stem cell regulation in planarians, demonstrating how principles  
28 distinct from those of vertebrate models can lead to robust homeostatic mechanisms.

## 29 Introduction

30 Stem cells are crucial for achieving and maintaining homeostasis. Paradoxically, they contribute to an  
31 organism's equilibrium through highly dynamic behavior, continuously balancing their population size by  
32 regulating division, self-renewal, and differentiation. Understanding the strategies used to accomplish this  
33 balance can provide the key to elucidating organismal homeostasis, as well as to modeling pathogenesis  
34 associated with disruption to this balance (e.g., cancer) [1,2].

35  
36 Mathematical models provide a means of distilling the complex biological dynamics that make up stem  
37 cell behavior into a set of basic underlying principles, which can potentially be used to predict the system's  
38 response to various perturbations. Indeed, numerous mathematical and computational models have been  
39 developed to describe the dynamics of adult stem cells in vertebrates [3,4]. Yet, valuable insights can be  
40 derived from modeling stem cell systems that rely on principles that differ significantly from those  
41 characterizing vertebrate stem cells. Neoblasts – adult planarian stem cells that function in tissue  
42 regeneration and maintenance – provide an intriguing platform in this regard. Neoblasts are pluripotent,  
43 avoid quiescence, and quickly adapt to changes in organismal requirements by adjusting the quantities  
44 and types of cells they produce [5]. Significantly, neoblast strategies to grow and maintain planarian  
45 tissues challenge fundamental concepts of vertebrate stem cells. For example, in adult vertebrates,  
46 hematopoietic stem cells typically divide slowly, giving rise to rapidly dividing transit amplifying cells  
47 forming tissue-specific progenitors [6,7]; these, in turn, bear the primary responsibility for maintaining  
48 homeostasis. Planarian neoblasts, in contrast, divide rapidly and do not employ transit amplifying cells for  
49 progeny production [8–10]. Moreover, neoblasts do not seem to retain memory of the progeny cell types  
50 they generate [8,9]. Notably, despite being essentially ageless and immortal, neoblasts do not display  
51 cancerous-like states [11]. Therefore, elucidating how neoblasts balance division, self-renewal, and  
52 differentiation can contribute to understanding fundamental strategies that facilitate tissue homeostasis  
53 [12].

54  
55 Prior models of neoblast dynamics in planarians have tended to focus on the entire animal system [13].  
56 However, analyzing isolated neoblasts and their progeny can be instrumental for understanding how  
57 decisions are made at a single cell resolution, as well as for deriving physiological parameter values (e.g.,  
58 corresponding to proliferation and differentiation) that are relevant to the larger system. *In vivo* analysis  
59 of individual neoblasts and their progeny is often achieved by applying subtotal irradiation to whole

60 planarians, which results in near-complete neoblast ablation [5]. Surviving neoblasts proliferate to form  
61 distinct colonies, allowing analysis of growth dynamics and progeny identity [14,15]. Though such analysis  
62 has been instrumental in uncovering regulators of proliferation and differentiation [14], a mathematical  
63 model of neoblast colony growth that integrates these principles has yet to be established and  
64 experimentally validated.

65

66 Several open questions must be taken into account in the development of such a model. For example, it  
67 is unclear whether neoblasts select their lineage identity in a synchronous manner or function  
68 independently [16,17]. Moreover, as indicated above, it is unclear whether neoblasts maintain memory  
69 of their decisions over successive rounds of cell cycles [10]. In addition, as discussed in what follows,  
70 critical knowledge is lacking regarding the ability of neoblasts to switch from producing differentiating  
71 lineage to contributing to neoblast colony growth; an understanding of this switch is fundamental to  
72 accurately capturing the overall development of a neoblast colony.

73

74 Herein, we begin to address these gaps, integrating  
75 experimental, analytical, and simulation approaches to  
76 develop a minimal model for neoblast colony growth. Our  
77 model does not assume communication between neoblasts or  
78 memory of cell fate decisions; rather, it explores whether  
79 straightforward stochastic selection of division outcome can  
80 adequately describe the growth of a neoblast colony. At the  
81 basis of our model is the assumption, based on *in vivo* analysis  
82 of neoblast clone growth, that neoblast division can result in  
83 three potential outcomes (Fig. 1) [8,15]: (1) symmetric  
84 renewal, which generates two neoblasts; (2) symmetric  
85 differentiation, which generates two post-mitotic cells;

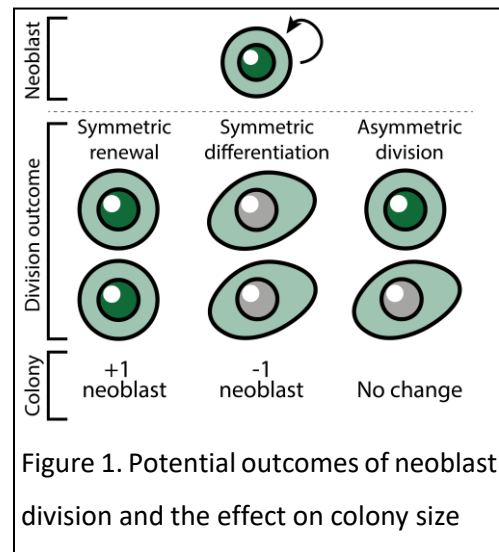

85 differentiation, which produces a  
86 neoblast and a post-mitotic cell.

87 In what follows, we first put forward a basic model of colony growth based on these principles. We derive  
88 key parameter values from experimental data and show that our model predicts colony growth with high  
89 accuracy. Next, in a series of experiments, we seek to uncover whether the core principles that drive  
90 neoblast colony growth (as proposed in our model) are further shaped by individual neoblasts' decisions  
91 regarding progeny lineage commitment. In particular, many S/G2/M neoblasts express fate-specifying

92 transcription factors (FSTFs), which direct the differentiation of their progeny into specific lineages [18–  
93 20]. Importantly, a neoblast can express different FSTFs in successive rounds of division, which results in  
94 production of post-mitotic progenitors of different lineages [8,9]. Thus, the growth potential of the colony  
95 is not compromised by FSTF expression. Yet, it remains unclear how the growth of a colony might be  
96 affected when expression of a particular FSTF (and thus the corresponding cell lineage) is blocked: for  
97 example, does colony growth remain stable, with other lineages being overexpressed to compensate for  
98 the blocked lineage? Notably, our experimental perturbation analysis shows that blocking the expression  
99 of an FSTF incapacitates a proportion of neoblasts equivalent to the size of the lineage affected. This  
100 observation reveals a critical dependency: once a neoblast commits to a specific lineage, it retains this  
101 identity until cell division concludes.

102

103 Together, our findings imply that simple design principles govern cell fate choices in neoblasts, and that  
104 accurate prediction of colony growth does not require assumptions of fate-specification memory, or  
105 coordination of cell fate choices between neoblasts. Moreover, our findings suggest that all neoblasts in  
106 a colony are functionally equivalent (i.e., able to self renew and to divide to all cell types), and elucidate  
107 the contribution of decisions in individual planarian stem cells to achieving systemic homeostasis.

## 108 **Results**

### 109 **Basic model for neoblast colony growth**

110 We developed a minimal model describing neoblast colony growth starting from a single neoblast,  
111 simulating a scenario where a surviving neoblast post-subtotal irradiation proliferates to form a colony.  
112 This colony serves as the exclusive source of new cells [5,14]. To estimate the change in colony size over  
113 time, we formulated an equation representing the exponential growth of a colony successfully established  
114 by a surviving neoblast (Eq. 1). In addition to the initial colony size ( $N_0$ ), the function incorporates three  
115 parameters to estimate colony growth (Eq. 2): (1) average cell cycle length ( $\tau$ ); (2) symmetric renewal  
116 probability ( $p$ ), where symmetric renewal rate per hour is  $p' = p\tau$ ; and (3) symmetric differentiation or  
117 neoblast elimination probability ( $q$ ), where symmetric differentiation or neoblast elimination rate per  
118 hour is  $q' = q\tau$ . Asymmetric divisions do not alter neoblast count (Fig 1).

119

$$120 \quad \frac{dN}{dt} = p'N - q'N = (p\tau - q\tau)N$$

121

[ 1 ]

122 We used the solution to the equation to predict colony sizes using a range of parameter values and  
123 evaluated the model predictions (Fig 2A; Fig S1) using our own and published data [8,14].

124

$$125 \quad N(t) = N_0 e^{(p\tau - q\tau)t}$$

126 [ 2 ]

127 The plots in Fig. 2A show how varying the value of each growth parameter is predicted to affect colony  
128 size. The rate of cell division ( $\tau$ ) has the most substantial impact on colony growth. For example, a  
129 simulated colony with a fast (16 hours) cell cycle (with  $p$  and  $q$  set at 0.5 and 0.1, respectively) had a  
130 neoblast count approximately ten times larger than that reported in literature [5,8,14,15,20]. To  
131 determine the average cell cycle rate ( $\tau$ ), we re-analyzed available colony growth data that had previously  
132 been obtained in experiments using Bromodeoxyuridine (BrdU) metabolic labeling [15]. In those  
133 experiments, BrdU was incorporated into DNA during both symmetric and asymmetric divisions using a  
134 pulse significantly shorter than the cell cycle (4 hours), followed by a chase of up to 72 hours (Fig 2B). We  
135 predicted that the BrdU<sup>+</sup> cell number would grow linearly until the entire population doubles. Then,  
136 completion of successive cell divisions would lead to exponential growth in BrdU<sup>+</sup> cell number. Indeed,  
137 the colony growth was initially linear (Pearson  $r = 0.997$ ), and using linear regression, we estimated that  
138 the colony doubling time, and hence the average cell cycle length, was 29.7 hours (Fig 2B).

139

140 The symmetric renewal probability ( $p$ ) is also a vital factor in colony growth, where even slight variations  
141 in  $p$  have large cumulative effects (Fig 2A). We experimentally determined the symmetric renewal  
142 probability by subjecting planarians to subtotal irradiation (1750 rad; Methods) and identifying neoblasts  
143 via fluorescence *in situ* hybridization (FISH) with the *smedwi-1* marker [21]. We imaged adjacent *smedwi-*  
144 *1*<sup>+</sup> cell pairs in the colony, and classified *smedwi-1*<sup>+</sup> cell pairs based on their *smedwi-1* expression levels:  
145 high-level pairs indicated symmetric renewal, while pairs with one high and one low *smedwi-1*<sup>+</sup> cell  
146 categorized as asymmetric division. Analysis of 40 dividing pairs produced an estimated symmetric  
147 renewal probability ( $p$ ) of 50% (Fig 2C), aligning with previous findings [8,15].

148

149 The value of  $q$ , representing symmetric differentiation and neoblast loss probability, also plays a role in  
150 colony dynamics (Fig 2B, S1B). Yet the value of this parameter is more difficult to estimate experimentally  
151 (e.g., naïve measurement of cell death using TUNEL in irradiated planarians would be insufficient, because  
152 cell death is not limited to neoblasts). Using simulations, we analyzed the effect of different neoblast  
153 elimination probabilities on colony size (Fig 2D; Fig S1B-E), and compared the model estimates with colony

154 size in our experimental data and by extracting colony size measurements from published literature (Fig  
 155 2D-E;) [5,8,14] (Methods). Considering  $p$  of 0.5 and an average cell cycle length of 29.7 hours, the  
 156 experimental data indicated that the average colony size was affected by symmetric differentiation or  
 157 death probability ( $q$ ), estimated at ~15% of the neoblasts in each cycle (Fig 2D, Fig S1B-E). Given the values  
 158 derived for  $p$  and  $q$ , we can conclude that asymmetrically dividing neoblasts account for 35% of cell  
 159 divisions (Fig 2F).

160  
 161 *In vivo*, we observed a large variation in the size of the colonies at each time point (Fig 2E). This could be  
 162 a consequence of altered delay between irradiation and the onset of colony growth, or from a stochastic  
 163 decision to undergo symmetrical or asymmetrical division in the early colony. Despite this variability, the  
 164 observed exponential growth suggested a steady proliferation rate once the colony founding neoblast  
 165 recovered at day four (Fig 2D, S1A).

166

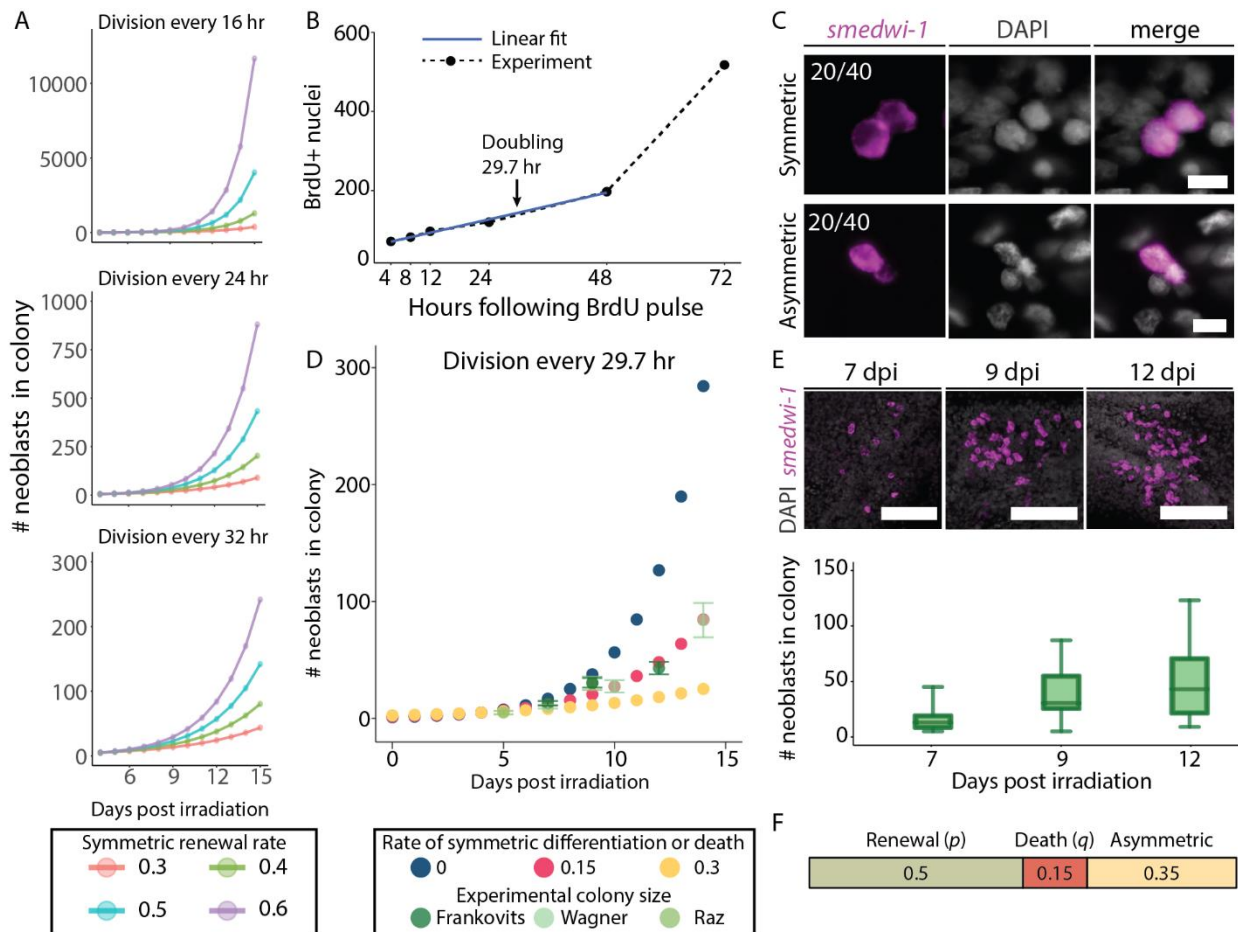

167

168 **Figure 2. Parameters determining neoblast colony size. (A) The impact of average cell cycle duration and fraction of symmetric**  
169 **renewal division on colony size is shown. (B) Re-analysis of BrdU incorporation time series [15] in expanding planarian colonies**  
170 **was used for determining the average cell cycle length (Methods). Linear regression (blue line;  $y = 59.77 + 2.81 * t$ ; Pearson  $r =$**   
171 **0.997) was used to identify the doubling time of the colony, and was determined as 29.7 hours (black arrow). (C) The fraction**  
172 **of symmetric renewal divisions was estimated by examining neoblast pairs in colonies (Methods). Scale = 10  $\mu\text{m}$ . (D) The impact**  
173 **of symmetric differentiation or neoblast elimination on colony size was tested, assuming a 29.7 hour long cell cycle and 50%**  
174 **symmetric renewal divisions. Experimental data of colony sizes at different time points were overlaid to determine the**  
175 **biologically-relevant parameter. Frankovits data collected here; Wagner, reanalysis [14]; Raz, reanalysis [8]. Error bars show**  
176 **the standard error. (E) Shown are neoblast colonies at three time points following subtotal irradiation. Representative images**  
177 **(z- projection) are shown (top), and neoblast counting of different colonies is shown (box indicates interquartile range;**  
178 **whiskers show range; horizontal bar indicates median). Scale = 100  $\mu\text{m}$ . (F) The estimated fractions of divisions leading to**  
179 **symmetric renewal, symmetric differentiation or elimination, and asymmetric divisions.**

## 180 **Inhibition of lineage differentiation reduces neoblast colony size**

181 Regulating growth and homeostasis requires balancing self-renewal and progeny production. To better  
182 understand how neoblasts maintain this balance, we focused on the interplay between the overall growth  
183 of the colony and the ability of individual neoblasts to express FSTFs, which are required for specific  
184 progeny production [19]. More specifically, we investigated how inhibiting differentiation into specific  
185 lineages, by suppressing FSTF expression, influences colony size. Considering the linear correlation  
186 between post-mitotic progeny production and neoblast number [9,14], we hypothesized three potential  
187 outcomes (Fig 3A) and their probable effects on symmetric renewal ( $p$ ) and symmetric differentiation or  
188 elimination ( $q$ ): (1) Unchanged:  $p$  and  $q$  remain balanced, resulting in no change in colony size. This  
189 outcome would suggest that the balance of self-renewal and progeny generation is preserved through  
190 compensatory production of alternative cell types when differentiation to a specific lineage is suppressed.  
191 (2) Larger: An increase in  $p$ , leading to larger colonies, possibly due to fewer asymmetric divisions in the  
192 blocked lineage. (3) Smaller: An increase in  $q$ , leading to smaller colonies, possibly because neoblasts  
193 committed to the blocked lineage become dysfunctional. We used published frequencies of three major  
194 lineages (epidermis, intestine, and *foxF-1*<sup>+</sup> neoblasts) to estimate the size of the colony in each of the  
195 described scenarios (Fig 3A) [9,19,22]. Theoretically, inhibiting a predominant lineage, such as the  
196 epidermal lineage (28%), may significantly affect colony size, which could be observed experimentally,  
197 whereas changes in colony size following inhibition of smaller lineages could be difficult to distinguish in  
198 the experiment time scale.

199

200 On the basis of this assumption, we inhibited differentiation into the epidermal lineage after subtotally  
201 irradiating planarians. Following a four-day recovery after subtotal irradiation, we suppressed the FSTF  
202 *zfp-1*, which is critical for production of differentiating epidermal progenitors (Fig S2) [5,9,23,24]. Then,  
203 we evaluated neoblast colony sizes in *zfp-1*-suppressed (*zfp-1* RNAi) planarians at three time points (7,  
204 9, and 12 days post-irradiation; dpi), and compared them with control colony sizes (Fig 3B, Methods).  
205 Initially (7 dpi), colony sizes were similar. However, at 9 dpi, *zfp-1* (RNAi) colonies were significantly smaller  
206 than in controls. Moreover, unlike in controls, *zfp-1* (RNAi) colonies showed no additional growth, on  
207 average, during the period between 9 dpi and 12 dpi, though there was a slight increase in the median  
208 colony size (Fig 3B).

209  
210 Our basic assumption was that reduction in colony size (vs. control) following *zfp-1* inhibition would  
211 indicate an increase in symmetric differentiation or elimination (*q*). However, an alternative possibility is  
212 that *zfp-1* inhibition causes mitotic arrest in neoblasts—which would prevent proliferation but would not  
213 necessarily result in cell death. We tested whether *zfp-1* (RNAi) colonies had a lower number of cycling  
214 neoblasts. We detected neoblasts in mitosis using immunofluorescence (IF) with an anti-H3P-antibody  
215 (Fig 3C; Methods). We found that control colonies did not significantly differ from *zfp-1* (RNAi) colonies in  
216 the number of H3P<sup>+</sup> cells, either in absolute numbers or normalized to average neoblast counts (Methods).  
217 This result suggested that FSTF inhibition did not cause a general mitotic arrest. Further analysis with 2'-  
218 Deoxy-2'-fluoro-5-ethynyluridine (EdU) labeling (Fig 3D; Methods) showed a substantial decrease in EdU<sup>+</sup>  
219 nuclei in *zfp-1* (RNAi) animals (vs. controls), indicating reduced new cell production. However, normalizing  
220 EdU<sup>+</sup> nuclei to average colony size (Fig 3D; Methods) revealed a comparable proportion of cells entering  
221 S-phase. Given the unchanged ratios of cycling and mitotic cells, we can conclude that the diminished  
222 colony size following *zfp-1* suppression is indeed likely to result either from increased symmetric  
223 differentiation or neoblast elimination (*q*). We further suggest that neoblast elimination is a more  
224 plausible explanation than increased symmetric differentiation: If *zfp-1* suppression were to lead to  
225 increased symmetric differentiation, we would expect to observe a noticeable decline in the number of  
226 neoblasts within colonies, while proliferation rates remained stable. Yet, our EdU-labeling experiments  
227 suggested a reduction in proliferation rates, suggesting that inhibition of the FSTF *zfp-1* likely led to  
228 increased neoblast elimination.



229

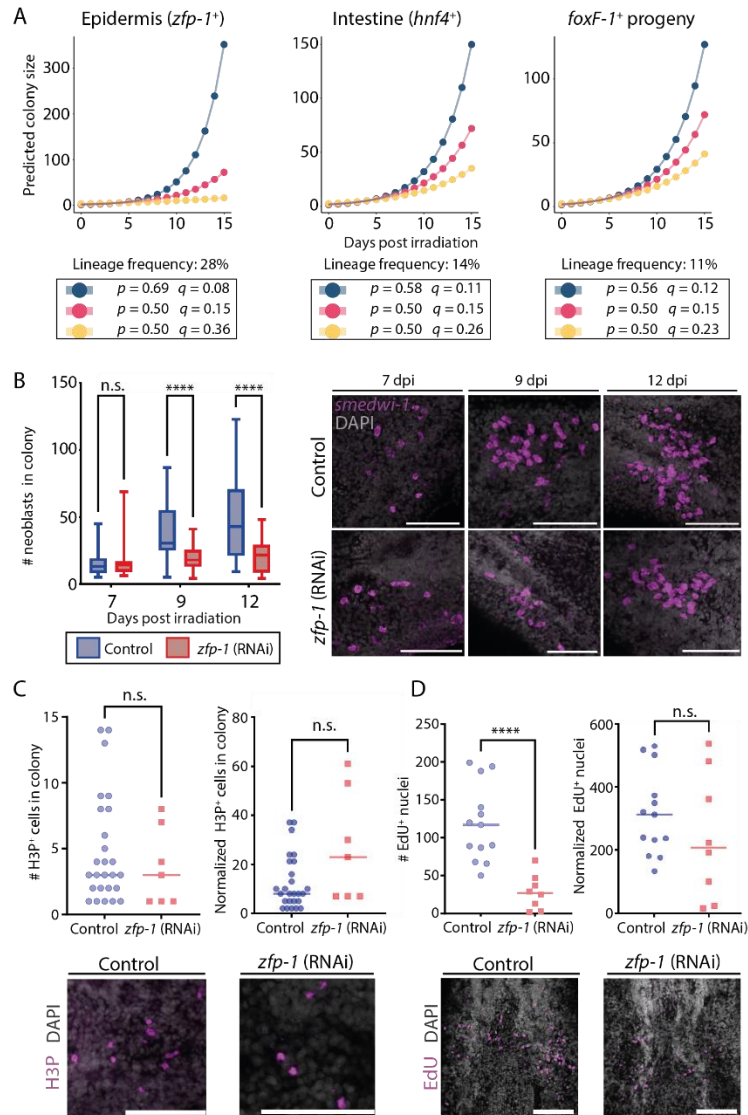

230 **Figure 3. Reduced neblast colony size following lineage specification block. (A)** Models for lineage growth. Potential outcomes  
 231 of lineage inhibitions were assessed by altering the colony growth and degradation parameters. Applying known lineage  
 232 frequencies to the models indicated that inhibiting production of a major lineage could dramatically impact colony size (left,  
 233 epidermis). By contrast, inhibition of smaller lineages (middle, right) might have a smaller impact, which would be difficult to  
 234 detect (Blue: increase in symmetric renewal; red: unchanged renewal and degradation; yellow: increase neblast degradation).  
 235 **(B)** Shown are counts (left) of neoblasts in colonies at three time points following irradiation, which was followed by inhibition  
 236 of *zfp-1* by RNAi. Lineage inhibition resulted in a highly significant decrease in colony size at later time points (box indicates  
 237 interquartile range (IQR), whiskers show range, bar indicates the median). Number of control colonies analyzed at 7 dpi n =  
 238 28; at 9 dpi n = 30; at 12 dpi n = 30; Number of *zfp-1* (RNAi) colonies analyzed at 7 dpi n=15; at 9 dpi n=30; at 12 dpi n = 30.  
 239 Representative colonies (z-projection) are shown (right). **(C)** Comparison of absolute (top-left) or normalized (top-right) H3P<sup>+</sup>  
 240 cell number in *zfp-1* (RNAi) and control colonies showed a non-significant difference (Methods). Representative H3P labeling  
 241 images are shown (Bottom). Importantly, the number of detectable H3P<sup>+</sup> cells was small. **(D)** Comparison of (top-left) EdU<sup>+</sup>

242 nuclei in *zfp-1* (RNAi) and control colonies showed a significant reduction, contributing to the smaller colony size. Comparison  
243 of normalized EdU+ nuclei numbers (top-right) showed a non-significant difference, indicating that a similar proportion of the  
244 neoblast in the colony were cycling (Methods). Representative EdU labeling images (z-projection) are shown (Bottom).  
245 Statistical significance was assessed using Mann Whitney two-tailed test (Methods). n.s., not significant,  $P < 0.05$ . Scale = 100  
246  $\mu\text{m}$ .

### 247 **Specialized neoblasts are produced in *zfp-1* (RNAi) colonies**

248 Building upon our findings regarding lineage-specific inhibition effects, we next investigated how RNAi of  
249 *zfp-1* affected the prevalence of other specialized neoblasts in colonies. We hypothesized that if neoblast  
250 elimination was the primary effect of *zfp-1* inhibition, we would observe an absolute decrease in  
251 specialized neoblasts of other lineages (e.g., intestine), but not necessarily a relative decrease. We used  
252 subtotal irradiation, and following recovery we inhibited *zfp-1*. Then, we counted specialized neoblasts  
253 expressing intestine lineage markers [5,19], and *tgs-1* [20], which is suggested to label neural progenitors  
254 (Fig 4A-B; Methods). Both control and *zfp-1* (RNAi) colonies contained specialized neoblasts. Notably, a  
255 decrease in intestine specialized neoblasts was detectable, aligned with the reduced colony size (Fig 4A).  
256 Small numbers of *tgs-1*<sup>+</sup> neoblasts were observed, with no significant reduction in their numbers (Fig 4B).  
257 Together, these results suggest that specialized neoblasts were produced in *zfp-1* (RNAi) colonies, but that  
258 production of other (non-suppressed) lineages did not increase, suggesting that neoblast elimination  
259 predominantly accounts for the reduction in colony size following suppression of the epidermal lineage,  
260 without compensation by overproduction of other lineages.

261  
262 To further analyze the impact of *zfp-1* inhibition on colony growth, we examined the numbers of neoblasts  
263 in 64 control colonies and in 53 *zfp-1* (RNAi) colonies, at 12 dpi (Fig 4C-D). The proportion of colonies  
264 containing five or more neoblasts was greater in the control group (75%) than in the *zfp-1* (RNAi) group  
265 (45%; Fisher's exact test two-tailed  $P = 0.001$ ). Importantly, more *zfp-1* (RNAi) animals failed to develop  
266 colonies compared to controls (55% and 25%, *zfp-1* (RNAi) and control colonies, respectively). This might  
267 have resulted from the stochastic selection of a *zfp-1* identity by the neoblasts that initially established  
268 the colony, and which led to their further dysfunction, and was therefore detrimental to the development  
269 of the colony.

## 270 **Modeling colony growth following *zfp-1* inhibition**

271 We developed a simulation to recapitulate the observed reduction in colony growth following *zfp-1*  
272 inhibition. Our simulation methodology was designed to mimic real-world neoblast dynamics under *zfp-1*  
273 inhibition, using empirically derived probabilities for each cell cycle outcome. First, we randomly sampled  
274 initial colony sizes from the set counted at 7 dpi (Fig 3B). In every simulation cycle, each neoblast fate was  
275 selected based on the probabilities of cell cycle outcomes identified above, derived from empirical data  
276 (symmetric renewal, asymmetric division, symmetric differentiation or elimination; Fig 2F). The change in  
277 colony size was calculated over approximately six cell cycles. We conducted 100 iterations per simulation  
278 and compared the results with experimental data (Fig 4E). The simulated colony sizes closely matched the  
279 experimental observations. When simulating *zfp-1* (RNAi) colony growth by increasing the symmetric  
280 differentiation or elimination probability ( $q$ ) by the known proportion of *zfp-1*<sup>+</sup> neoblasts, the model  
281 accurately replicated the experimental findings (Fig 4E-F). Notably, many simulated *zfp-1* (RNAi) colonies  
282 failed to grow, often because of initial sampling of a state of symmetric differentiation or elimination,  
283 prohibiting further development of the colony (Fig 4F).

284 The agreement of these simulations with the experimental results is aligned with a model where neoblasts  
285 independently select their cell cycle outcome based on a replication outcome distribution without  
286 maintaining any memory of previous replication outcomes. Moreover, inhibition of a gene required for  
287 neoblast differentiation (e.g., FSTF) impedes the contribution of neoblasts that randomly selected this  
288 identity from any further contribution to colony growth across the timescale of the simulation.

## 289 **Combined suppression of low-frequency lineages affects neoblast colony formation**

290 Our model and simulations indicate that inhibition of smaller lineages will not result in detectably smaller  
291 colonies (Fig S3A-C). We tested this model prediction by comparing colonies produced following  
292 suppression of intestine lineage progenitors [5,9,25], which account for 14% of the produced progenitors  
293 [8]. Indeed, highly efficient inhibition of the intestine lineage by RNAi (Fig S3D), did not result in reduced  
294 colony size or colony production, in agreement with our model (Fig 4G-H, S3A). This result corroborated  
295 the model's predictions regarding lower-frequency lineages (Fig 3A): the potential increase in  $q$  following  
296 suppression of differentiation to a lower-frequency lineage had undetectable effect on colony size.  
297 However, the model predicts that inhibition of several lineages, which collectively amount to a larger  
298 fraction of produced progenitors, may generate a detectable difference in successful colony

299 establishment. We co-suppressed the production of intestine lineage together with *foxF-1*<sup>+</sup> progenitors,  
 300 which together amount to 25% of the progenitors [8], following subtotal irradiation (Fig 4I). The co-  
 301 inhibition of the two lineages resulted in a highly significant increase in the failure to establish colonies  
 302 (8/9; 88.9%), compared to their controls (3/19; 15.8%; Fisher's exact test two-tailed  $P = 4 \times 10^{-4}$ ).

303 These results reinforce the hypothesis that FSTF inhibition reduces colony growth (vs. control), primarily  
 304 through increased neoblast elimination, without compensatory increases in other lineages. The results  
 305 also suggest that a neoblast that has selected an identity, but that cannot complete proliferation and  
 306 differentiation, will not be able to adopt any other identity in this experimental timescale. Based on these  
 307 conclusions, we propose a semi-stochastic model for selecting the outcome of neoblast division, assuming  
 308 no memory or coordination between cells, that is sufficient for describing the neoblast colony growth.

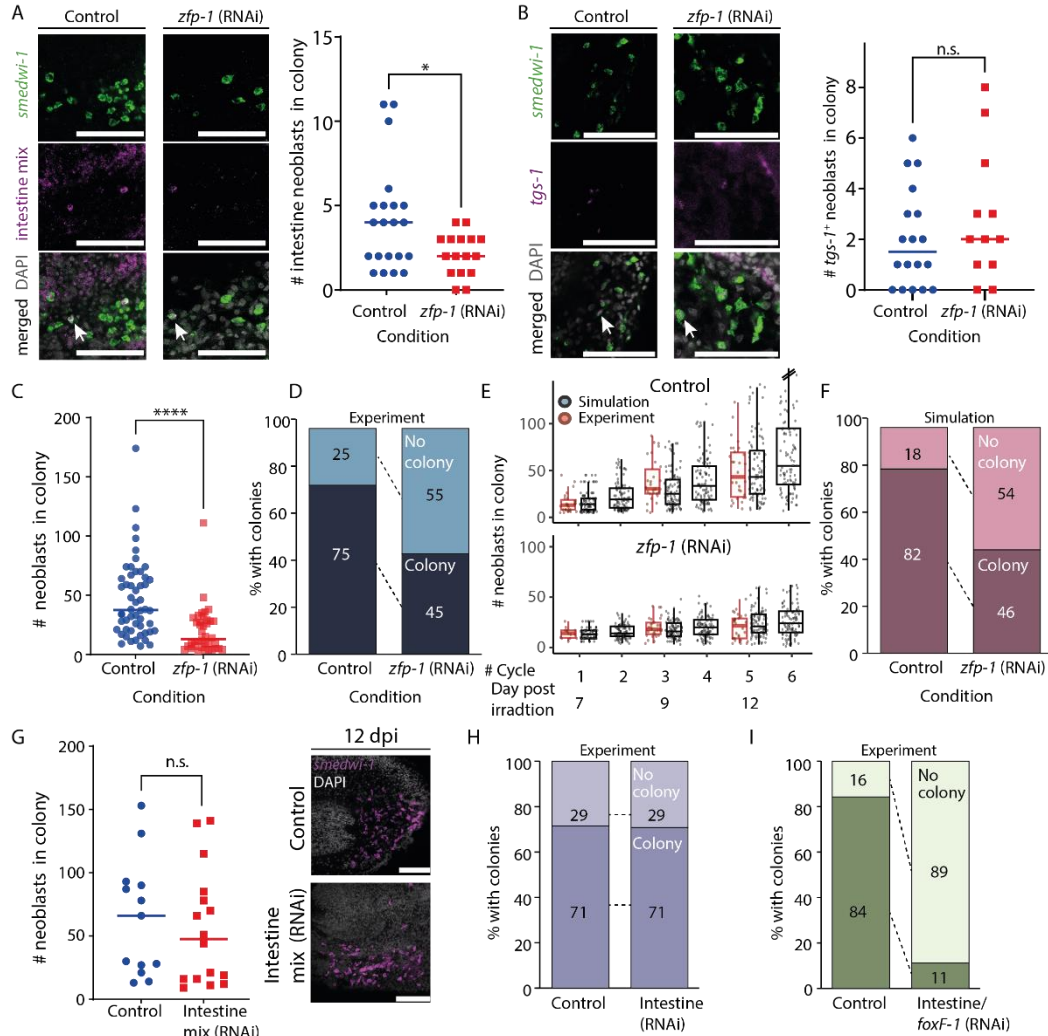

309

310 **Figure 4. Simulation of neoblast colony growth following lineage block. (A-B) Neoblasts expressing lineage gene expression**  
311 **markers were detected using fluorescence in situ hybridization (intestine mix: *hnf-4*, *gata4/5/6*, *nkx2.2*) and hybridization**  
312 **chain reaction (*tgs-1*), and counted in colonies of control and *zfp-1* (RNAi) animals at 12 dpi (Methods). Left panels show**  
313 **confocal images of representative colonies (Methods); quantification of the experiment is shown on the right. Scale= 100  $\mu$ m.**  
314 **(C) Comparison of colony size in control and in *zfp-1* (RNAi) animals 12 dpi showed a highly significant reduction in the size of**  
315 ***zfp-1* (RNAi) colonies (Mann Whitney two-tailed test,  $P < 0.0001$ ). (D) Summary of colony production in control and *zfp-1* (RNAi)**  
316 **animals based on analysis of 64 and 53 control and *zfp-1* (RNAi) colonies, respectively, at 12 dpi. Developed:  $\geq 5$  neoblasts**  
317 **detected; No colony  $< 5$  neoblasts detected. (E) Simulation of colony growth in control and *zfp-1* (RNAi) animals, bottom and**  
318 **top, respectively (Methods). Shown are multiple iterations (black dots;  $n = 100$  for each condition) of colony size simulation**  
319 **starting at 7 dpi. Experimental data quantifying colony sizes are shown (red dots) next to the corresponding simulation cycle.**  
320 **Box indicates the IQR; whiskers indicate  $\pm 1.5 \times$  IQR; values out of the whisker (outliers) were removed for clarity. (F) Summary**  
321 **of colony production in simulated control and *zfp-1* (RNAi) animals based on experimentally determined lineage frequencies,**  
322 **and assuming no memory in division outcome decision. Developed colony:  $\geq 5$  neoblasts in the simulation at day 12. (G)**  
323 **Neoblasts were counted in colonies 12 days following subtotal irradiation, which was followed by inhibition of intestine**  
324 **progenitors by combined RNAi treatment (*hnf-4*, *gata4/5/6*, *nkx2.2*). Lineage inhibition did not affect colony size (left).**  
325 **Representative colonies (z-projection) are shown (right). Scale = 100  $\mu$ m. (H-I) Summary of colony establishment in controls**  
326 **and following RNAi. (H) Suppression of intestine lineage did not affect the likelihood of producing colonies ( $n = 21$  and  $24$ ,**  
327 **control and RNAi animals, respectively). (I) Combined suppression of *foxF-1* [22] and intestine lineage production resulted in a**  
328 **significant reduction in the likelihood of producing colonies (Fisher's exact test two tailed  $P = 4 \times 10^{-4}$ ;  $n = 19$  and  $9$ , control and**  
329 **RNAi animals, respectively).**

### 330 **Inhibition of *zfp-1* does not induce overexpression of other lineages in homeostasis**

331 Clonal analysis is a powerful approach for studying neoblast proliferation and progeny production.  
332 However, the behavior of stem cells in homeostasis may differ from that observed in clonal growth. For  
333 example, unlike in clonal expansion, the stem cell population size remains unchanged during homeostasis  
334 (i.e.,  $p$  and  $q$  are equal). Moreover, the vastness of the neoblast population in homeostasis allows to  
335 examine the ability of neoblast to respecify their lineage overtime, and to determine if an FSTF inhibition  
336 results in an increase to cell death rate.

337

338 We examined whether the suppression of a major lineage production has resulted in overproduction of  
339 other lineages, a phenomenon that we did not observe in colonies. First, we used two published gene  
340 expression datasets from FACS-purified S/G2/M neoblasts in *zfp-1* (RNAi) and control animals collected at  
341 various time points [9,24] (Methods). We utilized a list of differentially expressed genes in these datasets  
342 [26], and annotated the cell types that express them [27]. Most downregulated genes with known  
343 neoblast lineage enrichment [27] were epidermal (82%, 55/67; Fig 5A; Table S1; Methods). Conversely,  
344 upregulated genes following *zfp-1* suppression were primarily associated with protonephridial or neural

345 neoblasts (30/57 and 20/57 genes, respectively; Fig 5B; Table S2), consistent with the original data analysis  
346 [24]. Notable upregulated genes included transcription factors, such as *nkx2-like* [28], *hunchback-like* [29],  
347 *runt-1* [30,31], and *tgs-1* [20]. Overexpression was evident from an intermediate timepoint (9 days post  
348 RNAi), whereas epidermal genes downregulation occurred earlier (6 days post RNAi; 30%, 20/67; FDR <  
349 1E-5).

350

351 We hypothesized that biologically meaningful upregulation of neuron- and protonephridia-associated  
352 genes in neoblasts following *zfp-1* inhibition would result in overexpression of genes associated with these  
353 cell types in whole tissues, reflecting their increased production. To test this hypothesis, we examined  
354 published gene expression data from whole and regenerated tissues in *zfp-1* inhibition [9,20]. Predictably,  
355 the majority of downregulated genes were associated with the epidermis (70%, 490/698; Fold change < -  
356 2; FDR < 1E-5; Table S3; Methods). Examination of upregulated genes showed that only a small fraction of  
357 the genes was associated with either protonephridial (4.9%) or neural (12.7%) expression at any examined  
358 time point (Fig 5C; Table S4; Methods). Therefore, gene expression analysis of whole tissues provided no  
359 evidence of an overrepresentation of neural or protonephridia cells in *zfp-1* (RNAi) animals, suggesting  
360 that cells related to these lineages were not excessively produced. Conversely, 37% of the overexpressed  
361 genes following *zfp-1* (RNAi) in the whole tissue libraries were associated with intestinal cell types, despite  
362 no evidence for overrepresentation of intestine-associated FSTFs in neoblasts isolated from *zfp-1* (RNAi)  
363 animals compared to controls (Table S4).

364

365 In *zfp-1* (RNAi) neoblast colonies, we observed an absolute reduction in cycling cells (Fig 3D). We tested  
366 whether this phenotype was recapitulated in homeostatic, unirradiated, *zfp-1* (RNAi) animals by EdU  
367 labeling. We injected *zfp-1* or control double-stranded (dsRNA) (Methods), and following three and five  
368 days, we performed EdU labeling by a 16 hour EdU pulse (Methods). Interestingly, there was an increase  
369 in EdU<sup>+</sup> nuclei in the *zfp-1* (RNAi) animals at both timepoints (Fig 5D). Investigating the potential  
370 correlation with apoptosis via TUNEL labeling revealed no early increase in cell death, only appearing at  
371 later stages (Fig 5E; Methods). Therefore, *zfp-1* inhibition does not trigger an acute rise in neoblast cell  
372 death that might induce hyperproliferation.

373

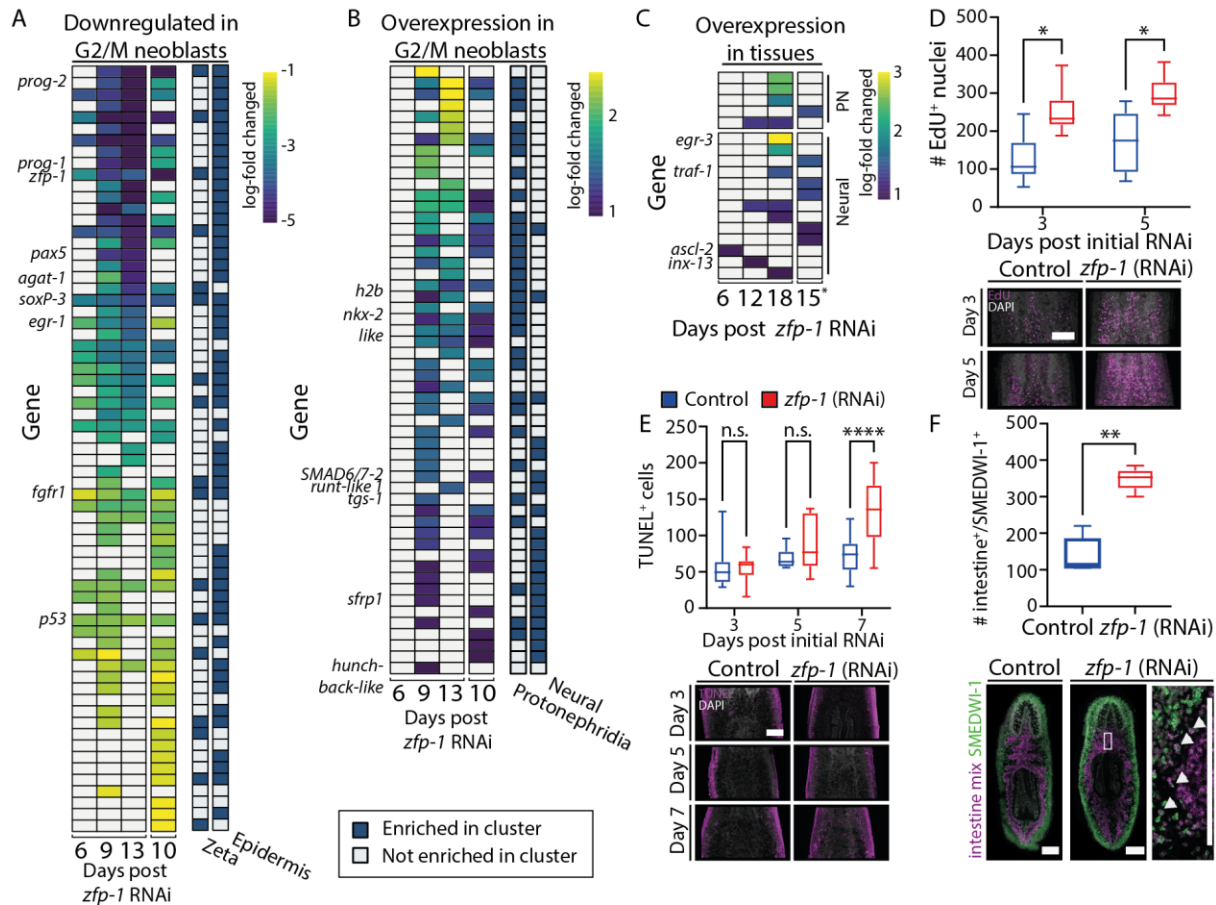

374

375 **Figure 5. Analysis of *zfp-1* inhibition consequences in homeostasis. (A) Downregulated genes in FACS-purified S/G2/M**  
 376 **neoblasts were overwhelmingly associated with expression in the epidermal lineage and epidermal-specialized (zeta)**  
 377 **neoblasts [9,24,27]. (B) Upregulated genes in FACS-purified S/G2/M neoblasts were largely associated with neuronal and**  
 378 **protonephridial specialized gene expression [27]. (C) Analysis of overexpressed genes of whole-tissues following *zfp-1***  
 379 **inhibition showed that only a few factors were associated with protonephridia or neurons. (A-C) Heatmaps showing row-scaled**  
 380 **gene expression obtained from PLANAtools [26] Blue and yellow, low and high log-fold gene expression difference,**  
 381 **respectively. Columns on the right indicate cell type-specific gene expression [27]. (D) Counting EdU+ nuclei in unirradiated**  
 382 **control and *zfp-1* (RNAi) animals. (E) Counting apoptotic cells in unirradiated control and *zfp-1* (RNAi) animals (Methods). (F)**  
 383 **Counting intestinal progenitors showed an increase in progenitors at later time points, in agreement with the gene expression**  
 384 **analysis of *zfp-1* (RNAi) of whole tissues. Scale = 100  $\mu$ m.  $P < 0.05$ .**

385

386 Colony sizes following *zfp-1* (RNAi) were reduced, yet cycling cell numbers in homeostasis were increased.  
 387 Similar results were reported for the epidermal regulator *Smad-p53* [24,32]: neoblast colonies following  
 388 *p53* (RNAi) are strikingly smaller, yet in homeostasis, *p53* (RNAi) animals show an increased number of  
 389 mitoses [32], and even initially an increase in canonical neoblast markers [32].

390 Considering that in homeostasis *zfp-1* (RNAi) planarians show greater numbers of cycling cells (Fig 5D) and  
391 intestinal gene overexpression in tissue (Table S4) as compared with controls, we conducted a targeted  
392 analysis to quantify the number of newly generated intestine progenitors in *zfp-1* (RNAi) animals. We  
393 counted intestine progenitors *in situ* (Fig 5F; Methods), and found a higher proportion of intestine  
394 progenitors in the *zfp-1* (RNAi) animals as compared with controls (Fig 5F; Mann–Whitney two-tailed U  
395 test  $P = 0.008$ ). Interestingly, in our analyses of growing colonies, we did not observe a parallel difference  
396 in intestine neoblast proportion (Fig 4A), leading us to speculate that the rise in cycling cells in homeostasis  
397 was an indirect effect of *zfp-1* (RNAi). In other words, integration of the analysis from homeostasis with  
398 our colony data suggests that *zfp-1* inhibition did not lead to a direct amplification of other lineages, but  
399 more likely to an indirect amplification of the intestine lineage.

## 400 Discussion

401 Understanding how stem cell proliferation and lineage choices are regulated is critical for elucidating  
402 mechanisms of growth and homeostasis [15,33–39]. Neoblasts form a simple yet powerful system, which  
403 has features of both adult stem cells and their transit-amplifying cell progeny [16,40,41]. Functionally,  
404 neoblasts can repopulate stem cell-depleted planarians, produce a diversity of cell types, and adjust their  
405 growth rate according to organism requirement and nutrient availability [42–45]. Herein, we sought to  
406 test whether a simple model (Fig 6) that does not assume communication between neoblasts or memory  
407 of cell fate decisions, and instead uses stochastic selection of division outcome, can predict the growth of  
408 a neoblast colony. We further sought to enrich this model with an understanding of the interplay between  
409 neoblast lineage decisions and colony growth – which has been missing from the literature thus far.

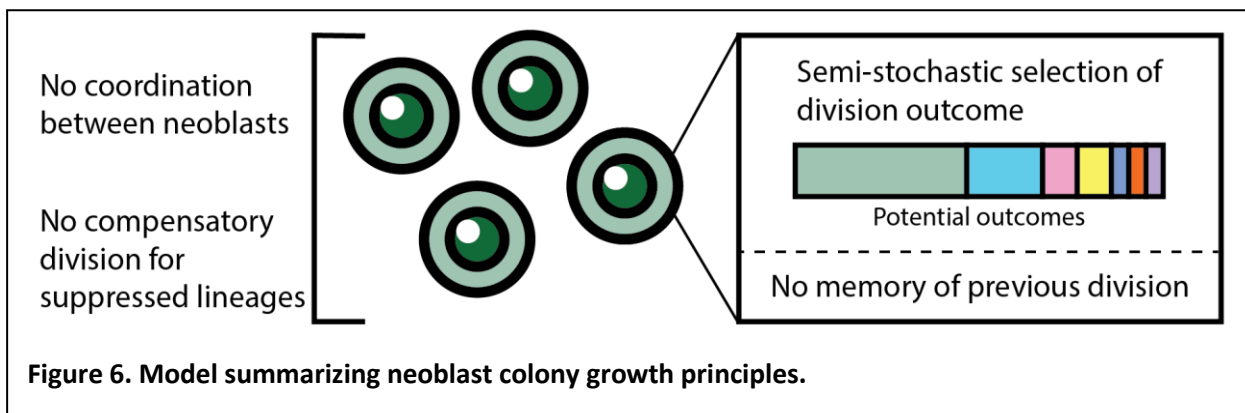



## 410 **Predictive modeling of neoblast colony expansion**

411 The initial model we developed was grounded in simple principles of colony growth (Equation 1, Fig. 2A),  
412 in which cell fate decisions are made stochastically and independently of one another, as a function of the  
413 following parameters: average cell cycle length, symmetric renewal rate, and symmetric differentiation  
414 and neoblast elimination rate. We experimentally derived parameter values and compared the model's  
415 predictions to experimental data. Our findings suggested that the reliance on minimal assumptions  
416 provides a good description of neoblast colony growth following subtotal irradiation. The model captured  
417 the average colony growth within the tested time range despite notable variability in observed colony  
418 sizes at a given time point. Based on these results, we suggest that if slow cycling neoblasts emerge in  
419 colonies, their contribution for colony growth is likely negligible, allowing their exclusion from the model  
420 without sacrificing accuracy.

421

422 To better understand the potential consequences of random cell death or excessive symmetric  
423 differentiation at early stages of colony growth, we used colony growth simulations, where each cell  
424 selected independently the outcome of its division. These simulations predicted that a fraction of colonies  
425 would fail to develop because of these random effects, a prediction that was corroborated by  
426 experimental results. This alignment demonstrates the utility of neoblasts as a system for studying stem  
427 cell colony formation and exploring concepts of stem cell behavior.

## 428 **Consequences of lineage-specific differentiation inhibition**

429 Moving from the fundamental aspects of neoblast colony growth, we next tested how limiting lineage  
430 identity selection affected neoblasts. We suppressed the expression of key fate-specifying genes to dissect  
431 how stem cells respond to inhibition of their differentiation trajectory. The transition from modeling  
432 general colony growth to specific lineage perturbations enabled us to examine the association of  
433 proliferation and lineage specification. In particular, suppressing the master epidermal regulator *zfp-1*,  
434 corresponding to the most abundant planarian cell lineage [8,9,24], drastically reduced neoblast colony  
435 growth rate. This observation led us to consider how stem cells balance self-renewal and differentiation,  
436 and why both processes were disrupted by blocking differentiation to a single lineage. We suggest several  
437 interpretations for this observation: First, if we assume that a neoblast can alternate between self-  
438 renewal and production of differentiated progeny in each cell cycle, then a decision to produce a blocked  
439 progeny may preclude further divisions of the neoblast. A second possibility is that the presence of specific

440 lineage, epidermal progenitors in this case, is required for other neoblasts to proliferate; in this case,  
441 suppression of differentiation could indirectly limit colony growth. The first interpretation is more likely  
442 relevant for understanding colony growth given our observation that combined suppression of several  
443 smaller lineages produced a similar inhibition to colony establishment.

444 The progressive reduction in colony size indicated that inhibition of a specific lineage reduced the fraction  
445 of neoblasts that contributed to colony growth, possibly due to their failure to produce the blocked  
446 lineage and to alter their progeny identity. Interestingly, in unirradiated animals with abundant neoblasts,  
447 *zfp-1* inhibition led to increased cell proliferation – a response also noted after suppressing other  
448 regulatory genes like *Smed-p53* [32]. This proliferation increase appeared before a rise in cell death,  
449 suggesting that cell death did not induce excessive proliferation in early stages. The difference in the  
450 consequence of lineage suppression in a neoblast colony and in unirradiated animals indicates that further  
451 investigation is needed into compensatory mechanisms that planarians use to maintain overall tissue  
452 integrity when differentiation processes are disrupted.

#### 453 **A stochastic model for independent selection of cell division outcome in colonies**

454 Our study investigates the mechanism behind neoblast division outcome selection. An exponential growth  
455 model accurately predicts the increase in colony size and the differentiation of progeny, closely aligning  
456 with experimental results [8,14]. Notably, our model operates without parameters for coordination of  
457 division outcome between neoblasts, or neoblast memory. It posits that division outcomes are  
458 determined by a stochastic process [46], guided by an innate distribution of cell fates encoded within the  
459 neoblasts. We hypothesize that this distribution is modifiable by regional signals (e.g., Wnt, BMP), which  
460 indicate the neoblast location [47–49], and by injury signals (e.g., ERK), that modulate division rate [17,50–  
461 52]. This strategy facilitates the dynamic balance in cell lineage production and meeting the organism  
462 needs without direct communication between neoblasts, and promotes return to homeostasis.

463  
464 The emerging model enhances the understanding of neoblast dynamics and contributes to broader  
465 knowledge of stem cell behavior. The interplay between lineage-specific differentiation, proliferation, and  
466 resultant physiological adaptations presents a robust strategy for using pluripotent stem cells for re-  
467 achieving balance, in a manner that is not found in many non-regenerative organisms. This could inspire  
468 future research of pluripotent stem cells and their applications for regenerative biology.

469

## 470 **Methods**

### 471 **Gene cloning and transformation**

472 Selected genes were amplified using planarian cDNA and gene-specific primers, and cloned into pGEM-T  
473 Easy vector using pGEM-T Easy Vector System I (Promega; CAT A1360). Vectors were transformed into  
474 *Escherichia coli* using the heat-shock method. Briefly, 5 µl of cloned plasmid were mixed with 100 µl of *E.*  
475 *coli* TOP10 bacteria and incubated on ice for 30 min. Next, bacteria were incubated for 45 s at 42°C, moved  
476 immediately to ice, and recovered in 350 µl of Luria Broth (LB) medium for 1 h at 37°C. Then, 100 µl of  
477 recovered bacteria were plated on agarose plates containing 1:1,000 Ampicillin, 1:200 Isopropyl β- d-1-  
478 thiogalactopyranoside (IPTG) and 1:625 5-bromo-4-chloro-3-indolyl-b-D-galactopyranoside (X-Gal). Plates  
479 were incubated overnight at 37°C, and colonies were screened by colony PCR using M13F and M13R  
480 primers with the following PCR program: (i) 5 min at 95°C; (ii) 34 cycles of 45 s at 95°C, 60 s at 55°C, and 2  
481 min at 72°C; (iii) 7 min at 72°C; (iv) hold at 10°C. Reactions were analyzed by gel electrophoresis, and  
482 colonies having the correct fragment were grown overnight in LB medium, supplemented with 1:1,000  
483 Ampicillin at 37°C in 180 rpm. Plasmids were purified with the NucleoSpin Plasmid MiniprepKit (CAT  
484 740588, Macherey-Nagel) and sequenced by Sanger sequencing. Primer sequences used for cloning the  
485 following genes: *hnf-4*, forward primer GATCTCGACAATGCACTCG, reverse primer  
486 GTCTCACGAACTCCTTGCCA; *nkx2.2*, forward primer TTTGGTGCCAGCAGACTCAA, reverse primer  
487 TAGAGCCAGCTAATGTGGCG; *gata4/5/6*, forward primer CGGTATTGTGCAATTCTCACCAG, reverse primer  
488 TGACATCGCAATTGGAACCG; *foxF-1*, forward primer GTCCTATTTCCAGCACACAGC, reverse primer  
489 TCCGGAATCGTGCTGAGG.

### 490 **Near complete neoblast ablation by subtotal irradiation**

491 Animals were irradiated using a BIOBEAM GM 8000 (Gamma-Service Medical GmbH). To generate 1-3  
492 colonies per animal, 2 mm starved (> 7 d) worms were irradiated with 1750 rads [14]. Worms were allowed  
493 to recover and washed in planarian water a day after the irradiation.

### 494 **Synthesis of dsRNA for feedings and microinjections**

495 DsRNA was synthesized as previously described [53]. Briefly, templates for in vitro transcription (IVT) were  
496 prepared by PCR amplification of cloned target genes using forward and reverse primers with flanking T7  
497 promoter sequences on the 5' end. dsRNA was synthesized using the TranscriptAid T7 High Yield  
498 Transcription Kit (CAT K0441, Thermo Scientific). Reactions were incubated overnight at 37°C and then

499 supplemented with RNase-free DNase for 30 min. RNA was purified by ethanol precipitation and  
500 resuspended in 70  $\mu$ l of ultra-pure H<sub>2</sub>O. RNA was analyzed on 1% agarose gel and quantified by Qubit  
501 (CAT Q33223, Thermo Scientific) for validating a concentration higher than 5  $\mu$ g/ $\mu$ l. Animals were starved  
502 for at least 7 d prior to RNAi experiments. In clonal expansion experiments, animals were fed with 14  $\mu$ l  
503 of dsRNA mixed with 25  $\mu$ l of beef liver 4 days post-irradiation. In homeostasis experiments, worms were  
504 injected 4 times with dsRNA every other day.

### 505 **Injections of dsRNA into planarians**

506 Animals were injected with *zfp-1* dsRNA using Nanoject III (CAT 3-000-207, Drummond Scientific  
507 company). Briefly, planarians were placed on a cold wet filter paper on their dorsal side, and were injected  
508 posterior to the pharyngeal cavity. After the initial puncture, 3 consecutive dsRNA injections of 33 nl each  
509 were delivered at a rate of 66 nl/sec. Worms were injected 4 times, every other day, and fixed at different  
510 time points for whole-mount analysis.

### 511 **Planarian fixation for whole-mount assays**

512 Fixation was performed as previously described [54]. Animals were killed with 5% N-Acetyl-L-Cysteine  
513 (NAC, CAT 1124220100, Mercury) in PBS for 5 min, then incubated with 4% Formaldehyde (FA) in 0.3%  
514 PBSTx (Phosphate Buffered Saline, 0.3% Triton X-100) for 20 min. Animals were then washed in PBSTx,  
515 50:50 PBSTx:methanol and stored in methanol at -20°C.

### 516 **Fluorescence in situ hybridization using tyramide signal amplification**

517 Fluorescence in situ hybridization (FISH) was performed as previously described [54] with minor changes.  
518 Briefly, fixed animals were bleached and treated with proteinase K (2  $\mu$ g/ml, CAT 25530-049; Invitrogen)  
519 in PBSTx (Phosphate Buffered Saline, 0.3% Triton X-100). Samples were incubated for 2 hr in a pre-  
520 hybridization buffer (pre-hyb) followed by an overnight incubation with probes. Samples were washed  
521 twice for 30 min in each solution: pre-hyb solution, 1:1 pre-hyb:2 $\times$ SSC, 2 $\times$ SSC, 0.2 $\times$ SSC, PBSTx. Blocking  
522 was performed in 0.5% Roche Western Blocking Reagent (CAT 11921673001; Sigma-Aldrich) and 5% heat-  
523 inactivated horse serum (CAT 04-124-1A; Biological Industries) in TNTx (100 mM Tris pH 7.5, 150 mM NaCl,  
524 0.3% Triton X-100) for 2 hr. Animals were incubated with an anti-DIG-POD antibody (1:1,500; Roche) or  
525 anti-DNP-HRP (1:10,000; Perkin-Elmer) overnight at 4°C. After antibody washes, tyramide development  
526 was performed as previously described [55]. Following development, peroxidase activation was quenched  
527 in a 1% sodium azide solution for 1 hr, followed by 6 PBSTx washes and antibody labeling for the second

528 probe. Samples were labeled with DAPI (1:5000 in PBSTx) overnight at 4°C and mounted with Vectasheild  
529 (CAT H-1000-10; Vector Laboratories).

### 530 **Immunofluorescence combined with FISH**

531 Animals were fixed with 5% NAC, bleached, and treated with proteinase K as described for FISH analysis.  
532 Samples were incubated for 2 hr in pre-hyb followed by overnight incubation with the probes. Samples  
533 were washed twice in each solution, for 30 min each: pre-hyb solution, 1:1 pre-hyb:2×SSC<sub>x</sub>, 2×SSC<sub>x</sub>,  
534 0.2×SSC<sub>x</sub>, PBSTx. Subsequently, blocking was performed in PBSTB (PBSTx, 0.25% BSA) for 2 hr at room  
535 temperature. Animals were then incubated with anti-SMEDWI-1 antibody (a gift from Peter W. Reddien,  
536 1:1000) at 4°C overnight. Then, 7 PBSTx washes were performed, followed by incubation with PBSTB  
537 blocking solution for 2 hr at room temperature followed by incubation with secondary antibody (goat anti  
538 rabbit-HRP, 1:300 in PBSTB) overnight at 4°C. Post-antibody washes and tyramide development  
539 (fluorescein tyramide; 1:2000) were performed as previously described [54]. After development,  
540 peroxidase activity was quenched using 1% sodium azide for 1 hr, followed by 6 PBSTx washes and  
541 incubation with anti-DIG antibody (1:1,500; CAT 11207733910; Sigma-Aldrich) overnight at 4°C. Post-  
542 antibody washes and development with rhodamine tyramide (1:1000) were performed as described  
543 above. Samples were incubated with DAPI (1:5000 in PBSTx) overnight and mounted with Vectashield.  
544

### 545 **FISH by hybridization chain reaction**

546 Probe sets (30 pairs per gene) were designed and synthesized by the manufacturer (Molecular  
547 Instruments, Los Angeles, CA, USA) for the following genes: *tgs-1* and *smedwi-1*. Worms were fixed and  
548 bleached as previously described for FISH. Next, hybridization chain reaction (HCR) was performed  
549 according to the manufacturer's HCR RNA-FISH protocol for samples in solution [56]. DAPI was added  
550 during the amplifier's wash steps, for a total incubation time of 2 hr at room temperature. Samples were  
551 mounted with Vectashield and stored at 4°C for subsequent analysis.

### 552 **Metabolic labeling by F-ara-EdU**

553 F-ara-EdU (CAT T511293; Sigma-Aldrich) was first diluted in DMSO to the concentration of 200 mg/ml.  
554 Animals were soaked with 2.5 mg/ml F-ara-EdU diluted in planarian water for 16 hr, 24 hr after the  
555 indicated injections. For clonal expansion analysis, samples were soaked with EdU for 16 hr at day 11 post  
556 irradiation. Samples were fixed, bleached, and treated with proteinase K as described for FISH [54]. Next,

557 3 washes in 3% PBSB (PBS supplemented with 3% BSA) were performed followed by a click reaction using  
558 baseclick kit (CAT Back-edu488, baseclick GmbH). Samples were washed 3 times with PBSB, incubated  
559 with DAPI (1:5,000 in PBSTx) overnight at 4°C and mounted with Vectashield.

### 560 **Immunofluorescence labeling by anti-H3P labeling**

561 H3P labeling was performed as previously described [46,57] with minor modifications. Briefly, following  
562 fixation with 5% NAC, bleaching and proteinase K treatment, blocking was performed with 10% heat  
563 inactivated horse serum for 2 hr. Next, anti-phospho-Histone H3 Antibody (CAT 04817; Sigma-Aldrich) was  
564 added in the concentration of 1:100 overnight in 4°C, followed by 7 PBSTx washes. Samples were  
565 incubated in blocking solution for 2 hr and then incubated with goat anti-rabbit-HRP secondary antibody  
566 (Abcam; ab6721; 1:300) overnight at 4°C. Samples were washed 7 times with PBSTx, developed using  
567 rhodamine tyramide diluted 1:1,000 in PBSTi (PBSTx, 0.07% imidazole), labeled with DAPI overnight at  
568 4°C, and mounted with Vectashield.

### 569 **Image acquisition and cell counting**

570 Images of samples labeled by FISH, HCR, immunofluorescence, F-ara-EdU and TUNEL were collected using  
571 a Zeiss LSM800 confocal microscope. Labeled cells were counted manually using the cell counter module  
572 in the ImageJ software [58].

### 573 **TUNEL labeling**

574 TUNEL was performed as previously described [59] with minor modifications. Briefly, animals were fixed  
575 with 5% NAC and bleached overnight with 6% hydrogen peroxide in PBSTx. Animals were then treated  
576 with 2 µg/ml proteinase K for 10 min, 4% FA for 10 min, and were then washed twice with PBS. Using  
577 ApopTag Red In Situ Apoptosis Detection Kit (CAT S7165; Sigma-Aldrich), 5 animals per tube were  
578 incubated with TdT enzyme mix for 4 hr at 37°C, followed by 4 PBSTx washes. Samples were incubated in  
579 a blocking solution (0.5% Roche Western Blocking Reagent and 5% inactivated horse serum in TNTx) for 2  
580 hr followed by incubation with anti-DIG antibody (1:1000) overnight at 4°C. Samples were washed 7 times  
581 with PBSTx, developed using rhodamine tyramide diluted 1:1,000, labeled with DAPI (1:5000 in PBSTx)  
582 overnight at 4°C and mounted with Vectashield.

### 583 **Estimation of the fraction of symmetric renewal divisions**

584 Colonies from 7, 9, and 12 dpi were labeled by FISH with the pan-neoblast marker *smedwi-1*. Colonies  
585 were closely examined using a confocal microscope (Zeiss LSM800) to find two adjacent *smedwi-1+* cells.  
586 Two labeled cells with high expression of *smedwi-1* marker were classified as symmetric division. Pairs  
587 composed of high *smedwi-1+* cell and low *smedwi-1+* cell were classified as asymmetrically dividing.

### 588 **Data extraction from published literature**

589 Data was extracted using WebPlotDigitizer by labeling data points [60]. Table S5 summarizes the extracted  
590 data and the original data source.

### 591 **Simulation of colony growth**

592 Simulations were performed using custom R code, executing as follows: selection of parameters occurred  
593 using selected frequencies of symmetric renewal, and symmetric differentiation or elimination. Initial  
594 colony size was determined by randomly selecting a value from empirical distribution of early colony size,  
595 as reported in the literature [5,8]. In each simulation round, every cell underwent selection of an outcome,  
596 adhering to the predefined frequencies. This simulation process extended up to 20 cycles and was  
597 replicated 1000 times.

### 598 **Gene expression analysis of S/G2/M neoblasts**

599 Processed differential gene expression data profiling FACS-purified S/G2/M neoblasts isolated from  
600 control and *zfp-1* (RNAi) animals was downloaded from PLANATools [26]. Each gene in the table was  
601 assigned a cell type identity based on the planarian cell type gene expression atlas [27].

### 602 **Statistical analyses**

603 Statistical tests were performed using GraphPad Prism (v 10.0.3) or using the scipy stat module (v 1.12).  
604 Statistical significance was assessed using Mann-Whitney two-tailed U test or two-tailed Student's t test  
605 and threshold for considering an effect significant was 0.05, unless stated otherwise.

606

607 **Supplementary Figures**

608 **Figure S1**

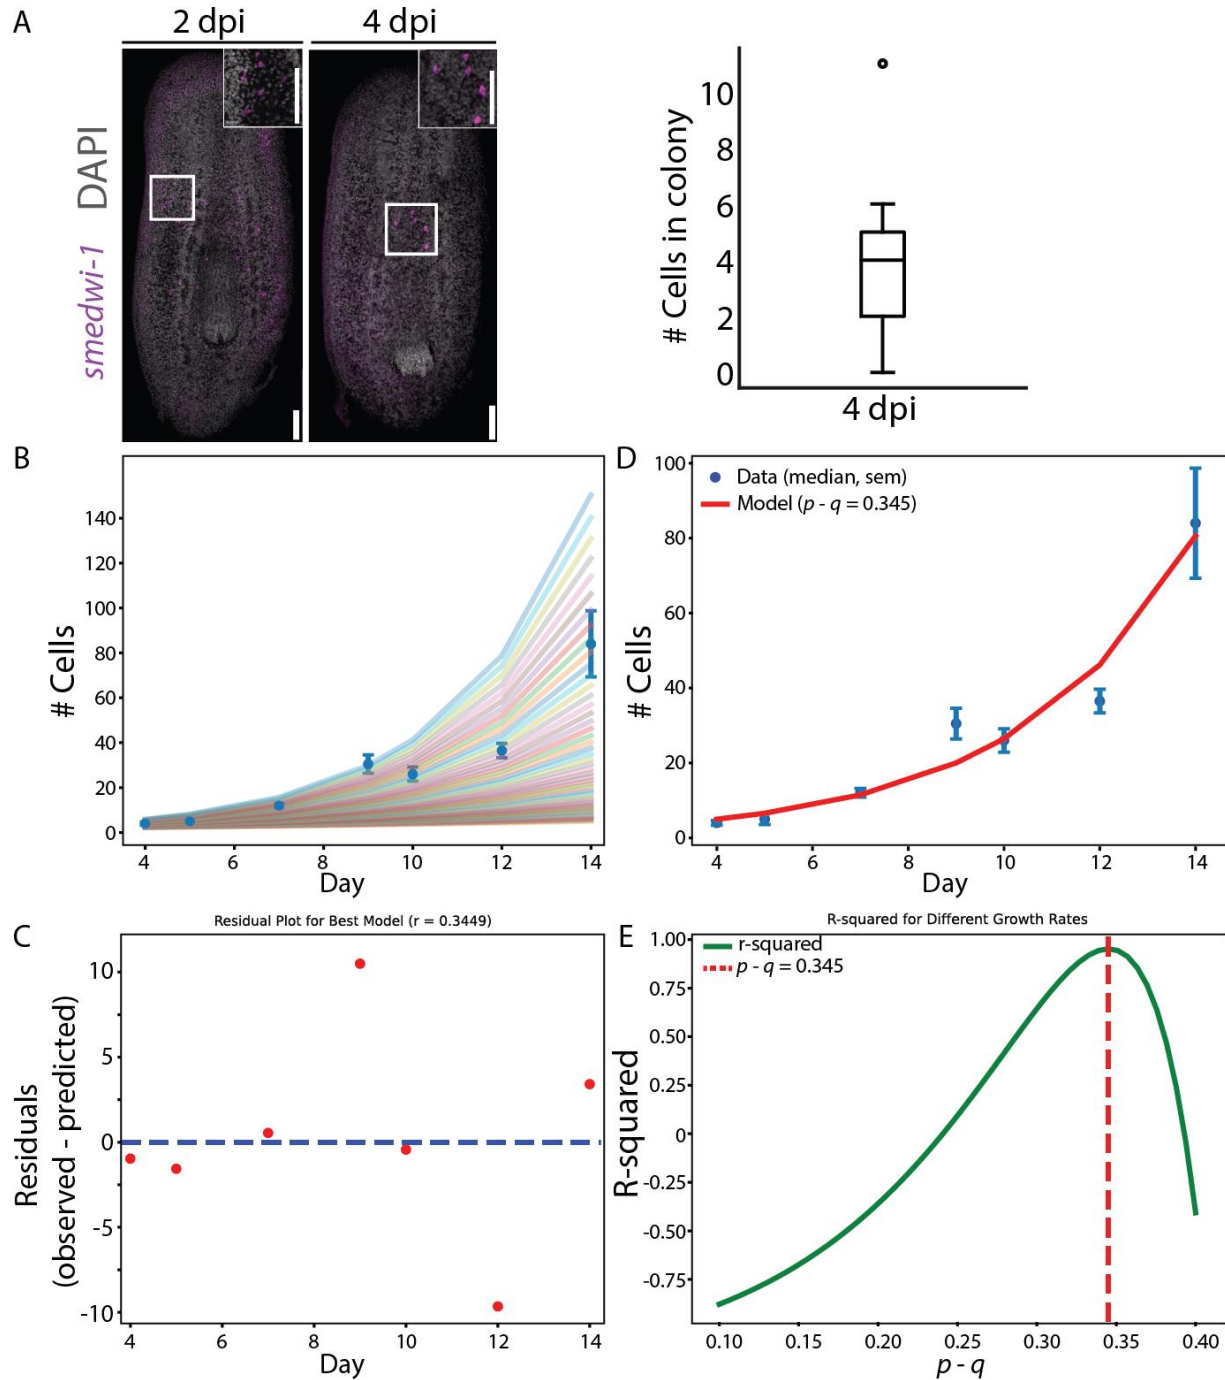

609  
610 **Figure S1. Analysis of colony growth. (A)** Shown are FISH images for detecting neoblasts (*smedwi-1*<sup>+</sup>; magenta) at 2 and 4 days  
611 post irradiation (dpi), left and right, respectively. Colonies were not found at 2 dpi, and instead isolated *smedwi-1*<sup>+</sup> were  
612 scattered in the planarian parenchyma. At 4 dpi, single neoblasts already established small colonies (median = 4 cells;



613 quantification shown on right). (B-E) The effect of different growth parameters on colony size. (B) Shown are colony sizes when  
614 considering a range of  $q$  values (0.1 - 0.4) with the experimentally determined  $p = 0.5$ . Data collected here and in published  
615 analyses of colony sizes [8,14] is shown as median (blue dots, and standard error of the mean). (C) Shown is the best predicted  
616 fit growth following colony establishment using the exponential growth equation. (D) Analysis of residuals between observed  
617 and predicted colony sizes using the best fitting parameters. (E) Shown is the r-squared difference between observed and  
618 predicted data at a range of growth parameters. The minimal r-squared value is indicated by the red dashed line.

619 **Figure S2**

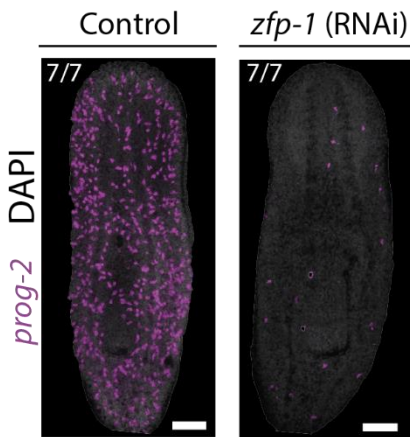

620  
621 **Figure S2. Inhibition of epidermal progenitors by a single *zfp-1* dsRNA injection. Inhibition of *zfp-1* resulted in complete ablation**  
622 **of epidermal progenitor production as observed by labeling animals with the epidermal progenitor marker, *prog-2*.**  
623

624 **Figure S3**

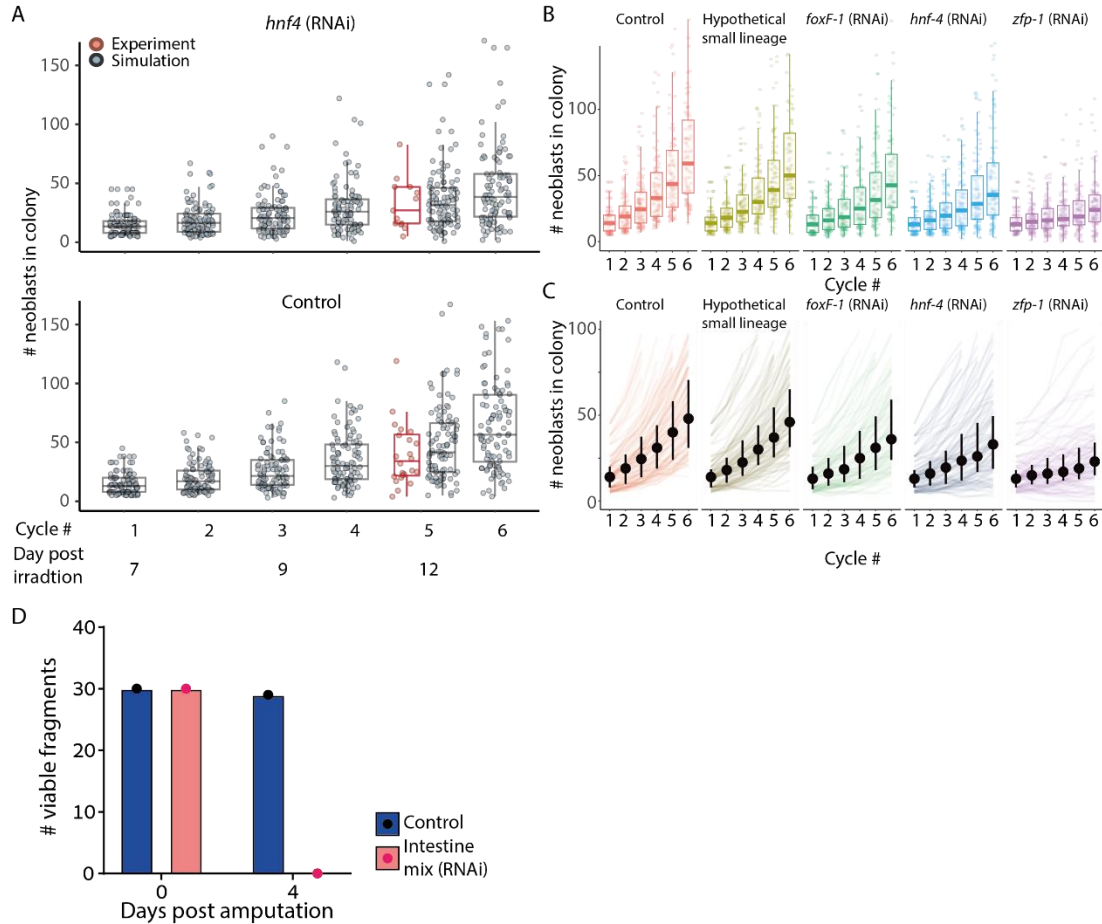

625  
 626 **Figure S3. Simulation of colony size following RNAi. (A) Simulation (gray) and comparison to experimental data (red) of**  
 627 **neoblast colonies in control and *hnf-4* (RNAi) animals. The simulation indicates that given the variability in colony size,**  
 628 **detecting significant differences colony size is unlikely for this lineage. Each dot represents a single simulation (gray) or an**  
 629 **experimentally determined size (red). (B-C) Simulations of colony sizes over 6 cycles of replication starting approximately at**  
 630 **day seven post irradiation. (B) Boxplots showing the distribution of colony sizes (horizontal line, median; box, interquartile**  
 631 **range (IQR); vertical line, 99% range). Each dot represents a single simulation. (C) Simulation of colony growth (line) shows**  
 632 **growth over time (dot, median; vertical line, IQR). (D) The RNAi efficacy was evaluated through assessment of viability of**  
 633 **fragments obtained from animals following a single feeding of dsRNA that targeted intestine FSTFs (*hnf-4, gata4/5/6, nkx2.2*),**  
 634 **compared to a non-targeting control dsRNA (*unc22*). All fragments derived from worms fed with dsRNA targeting intestine**  
 635 **FSTFs died within four days post-feeding, demonstrating that a single dsRNA feeding induced a robust effect.**

636

637

## 638 **Supplementary Tables**

### 639 **Table S1**

640 Table S1. Downregulated genes in G2/M neoblasts following *zfp-1* (RNAi)

### 641 **Table S2**

642 Table S2. Upregulated genes in G2/M neoblasts following *zfp-1* (RNAi).

### 643 **Table S3**

644 Table S3. Downregulated genes in tissues or blastema following *zfp-1* (RNAi)

### 645 **Table S4**

646 Table S4. Upregulated genes in tissues or blastema following *zfp-1* (RNAi)

### 647 **Table S5**

648 Table S5. Summary of data extraction using WebPlotDigitizer

## 649 **Author contributions**

650 T.F. and O.W. designed the project. T.F. performed all experiments with support from P.V.C, Y.Y., and  
651 S.D.. T.F. performed microscopy and imaging analysis. O.W. performed simulations and RNAseq data  
652 analysis. T.F. and O.W. wrote and edited the manuscript.

## 653 **Conflict of interest**

654 The authors do not have conflict of interests to declare.

## 655 **Acknowledgements**

656 We thank Prof. David Sprinzak and Dr. Yasmine Meroz for their critical input. We thank Shrey Jain for his  
657 assistance with performing FISH. We thank members of the Wurtzel lab for feedback and discussions.  
658 We thank Dr. Daria Makarovskiy from the interdepartmental services at Tel Aviv University's Faculty of

659 Medicine for assistance with gamma irradiation. O.W. is supported by the Israel Science Foundation  
660 (grant 2039/18) and the European Research Council (no. 853640). O.W. is a Zuckerman Faculty Scholar.  
661

## 662 References

- 663 1. Singh, S.R., Burnicka-Turek, O., Chauhan, C., and Hou, S.X. (2011). Spermatogonial stem cells,  
664 infertility and testicular cancer. *J. Cell. Mol. Med.* *15*, 468–483.
- 665 2. Passegué, E., Jamieson, C.H.M., Ailles, L.E., and Weissman, I.L. (2003). Normal and leukemic  
666 hematopoiesis: are leukemias a stem cell disorder or a reacquisition of stem cell characteristics?  
667 *Proc Natl Acad Sci USA* *100 Suppl 1*, 11842–11849.
- 668 3. Marciniak-Czochra, A., Stiehl, T., Ho, A.D., Jäger, W., and Wagner, W. (2009). Modeling of  
669 asymmetric cell division in hematopoietic stem cells--regulation of self-renewal is essential for  
670 efficient repopulation. *Stem Cells Dev.* *18*, 377–385.
- 671 4. Paździorek, P.R. (2014). Mathematical model of stem cell differentiation and tissue regeneration  
672 with stochastic noise. *Bull. Math. Biol.* *76*, 1642–1669.
- 673 5. Wagner, D.E., Wang, I.E., and Reddien, P.W. (2011). Clonogenic neoblasts are pluripotent adult  
674 stem cells that underlie planarian regeneration. *Science* *332*, 811–816.
- 675 6. Abkowitz, J.L., Golinelli, D., Harrison, D.E., and Gutter, P. (2000). In vivo kinetics of murine  
676 hemopoietic stem cells. *Blood* *96*, 3399–3405.
- 677 7. Becker, K.A., Ghule, P.N., Therrien, J.A., Lian, J.B., Stein, J.L., van Wijnen, A.J., and Stein, G.S.  
678 (2006). Self-renewal of human embryonic stem cells is supported by a shortened G1 cell cycle  
679 phase. *J. Cell. Physiol.* *209*, 883–893.
- 680 8. Raz, A.A., Wurtzel, O., and Reddien, P.W. (2021). Planarian stem cells specify fate yet retain  
681 potency during the cell cycle. *Cell Stem Cell* *28*, 1307-1322.e5.
- 682 9. van Wolfswinkel, J.C., Wagner, D.E., and Reddien, P.W. (2014). Single-cell analysis reveals  
683 functionally distinct classes within the planarian stem cell compartment. *Cell Stem Cell* *15*, 326–  
684 339.
- 685 10. Pearson, B.J. (2022). Finding the potency in planarians. *Commun. Biol.* *5*, 970.
- 686 11. Van Roten, A., Barakat, A.Z.A.-Z., Wouters, A., Tran, T.A., Mouton, S., Noben, J.-P., Gentile, L., and  
687 Smeets, K. (2018). A carcinogenic trigger to study the function of tumor suppressor genes in  
688 *Schmidtea mediterranea*. *Dis. Model. Mech.* *11*.
- 689 12. Levin, M., Pietak, A.M., and Bischof, J. (2019). Planarian regeneration as a model of anatomical  
690 homeostasis: Recent progress in biophysical and computational approaches. *Semin. Cell Dev.*  
691 *Biol.* *87*, 125–144.
- 692 13. Mangel, M., Bonsall, M.B., and Aboobaker, A. (2016). Feedback control in planarian stem cell  
693 systems. *BMC Syst. Biol.* *10*, 17.
- 694 14. Wagner, D.E., Ho, J.J., and Reddien, P.W. (2012). Genetic regulators of a pluripotent adult stem  
695 cell system in planarians identified by RNAi and clonal analysis. *Cell Stem Cell* *10*, 299–311.

- 696 15. Lei, K., Thi-Kim Vu, H., Mohan, R.D., McKinney, S.A., Seidel, C.W., Alexander, R., Gotting, K.,  
697 Workman, J.L., and Sánchez Alvarado, A. (2016). Egf signaling directs neoblast repopulation by  
698 regulating asymmetric cell division in planarians. *Dev. Cell* 38, 413–429.
- 699 16. Reddien, P.W. (2018). The cellular and molecular basis for planarian regeneration. *Cell* 175, 327–  
700 345.
- 701 17. Bohr, T.E., Shiroor, D.A., and Adler, C.E. (2021). Planarian stem cells sense the identity of the  
702 missing pharynx to launch its targeted regeneration. *eLife* 10.
- 703 18. Reddien, P.W. (2013). Specialized progenitors and regeneration. *Development* 140, 951–957.
- 704 19. Scimone, M.L., Kravarik, K.M., Lapan, S.W., and Reddien, P.W. (2014). Neoblast specialization in  
705 regeneration of the planarian *Schmidtea mediterranea*. *Stem Cell Reports* 3, 339–352.
- 706 20. Zeng, A., Li, H., Guo, L., Gao, X., McKinney, S., Wang, Y., Yu, Z., Park, J., Semerad, C., Ross, E., *et al.*  
707 (2018). Prospectively isolated Tetraspanin<sup>+</sup> neoblasts are adult pluripotent stem cells underlying  
708 planaria regeneration. *Cell* 173, 1593-1608.e20.
- 709 21. Reddien, P.W., Oviedo, N.J., Jennings, J.R., Jenkin, J.C., and Sánchez Alvarado, A. (2005). SMEDWI-  
710 2 is a PIWI-like protein that regulates planarian stem cells. *Science* 310, 1327–1330.
- 711 22. Scimone, M.L., Wurtzel, O., Malecek, K., Fincher, C.T., Oderberg, I.M., Kravarik, K.M., and  
712 Reddien, P.W. (2018). *foxF-1* Controls Specification of Non-body Wall Muscle and Phagocytic  
713 Cells in Planarians. *Curr. Biol.* 28, 3787-3801.e6.
- 714 23. Tu, K.C., Cheng, L.-C., T K Vu, H., Lange, J.J., McKinney, S.A., Seidel, C.W., and Sánchez Alvarado,  
715 A. (2015). Egr-5 is a post-mitotic regulator of planarian epidermal differentiation. *eLife* 4, e10501.
- 716 24. Cheng, L.-C., Tu, K.C., Seidel, C.W., Robb, S.M.C., Guo, F., and Sánchez Alvarado, A. (2018).  
717 Cellular, ultrastructural and molecular analyses of epidermal cell development in the planarian  
718 *Schmidtea mediterranea*. *Dev. Biol.* 433, 357–373.
- 719 25. Forsthoefel, D.J., James, N.P., Escobar, D.J., Stary, J.M., Vieira, A.P., Waters, F.A., and Newmark,  
720 P.A. (2012). An RNAi screen reveals intestinal regulators of branching morphogenesis,  
721 differentiation, and stem cell proliferation in planarians. *Dev. Cell* 23, 691–704.
- 722 26. Hoffman, M., and Wurtzel, O. (2023). PLANAtools-An interactive gene expression repository for  
723 the planarian *Schmidtea mediterranea*. *Front. Cell Dev. Biol.* 11, 1149537.
- 724 27. Fincher, C.T., Wurtzel, O., de Hoog, T., Kravarik, K.M., and Reddien, P.W. (2018). Cell type  
725 transcriptome atlas for the planarian *Schmidtea mediterranea*. *Science* 360.
- 726 28. Currie, K.W., Molinaro, A.M., and Pearson, B.J. (2016). Neuronal sources of hedgehog modulate  
727 neurogenesis in the adult planarian brain. *eLife* 5.
- 728 29. Reddien, P.W., Bermange, A.L., Murfitt, K.J., Jennings, J.R., and Sánchez Alvarado, A. (2005).  
729 Identification of genes needed for regeneration, stem cell function, and tissue homeostasis by  
730 systematic gene perturbation in planaria. *Dev. Cell* 8, 635–649.

- 731 30. Wenemoser, D., Lapan, S.W., Wilkinson, A.W., Bell, G.W., and Reddien, P.W. (2012). A molecular  
732 wound response program associated with regeneration initiation in planarians. *Genes Dev.* *26*,  
733 988–1002.
- 734 31. Sandmann, T., Vogg, M.C., Owlarn, S., Boutros, M., and Bartscherer, K. (2011). The head-  
735 regeneration transcriptome of the planarian *Schmidtea mediterranea*. *Genome Biol.* *12*, R76.
- 736 32. Pearson, B.J., and Sánchez Alvarado, A. (2010). A planarian p53 homolog regulates proliferation  
737 and self-renewal in adult stem cell lineages. *Development* *137*, 213–221.
- 738 33. Zhu, S.J., Hallows, S.E., Currie, K.W., Xu, C., and Pearson, B.J. (2015). A mex3 homolog is required  
739 for differentiation during planarian stem cell lineage development. *eLife* *4*.
- 740 34. Scimone, M.L., Meisel, J., and Reddien, P.W. (2010). The Mi-2-like *Smed-CHD4* gene is required  
741 for stem cell differentiation in the planarian *Schmidtea mediterranea*. *Development* *137*, 1231–  
742 1241.
- 743 35. Dagan, Y., Yesharim, Y., Bonneau, A.R., Frankovits, T., Schwartz, S., Reddien, P.W., and Wurtzel,  
744 O. (2022). m6A is required for resolving progenitor identity during planarian stem cell  
745 differentiation. *EMBO J.* *41*, e109895.
- 746 36. Li, L., and Xie, T. (2005). Stem cell niche: structure and function. *Annu. Rev. Cell Dev. Biol.* *21*,  
747 605–631.
- 748 37. Morrison, S.J., and Spradling, A.C. (2008). Stem cells and niches: mechanisms that promote stem  
749 cell maintenance throughout life. *Cell* *132*, 598–611.
- 750 38. Chan, A., Ma, S., Pearson, B.J., and Chan, D. (2021). Collagen IV differentially regulates planarian  
751 stem cell potency and lineage progression. *Proc Natl Acad Sci USA* *118*.
- 752 39. Ferraro, F., Celso, C.L., and Scadden, D. (2010). Adult stem cells and their niches. *Adv. Exp. Med.*  
753 *Biol.* *695*, 155–168.
- 754 40. Baguña, J. (2012). The planarian neoblast: the rambling history of its origin and some current  
755 black boxes. *Int. J. Dev. Biol.* *56*, 19–37.
- 756 41. Adler, C.E., and Sánchez Alvarado, A. (2015). Types or states? cellular dynamics and regenerative  
757 potential. *Trends Cell Biol.* *25*, 687–696.
- 758 42. Salvetti, A., Rossi, L., Bonucelli, L., Lena, A., Pugliesi, C., Rainaldi, G., Evangelista, M., and  
759 Gremigni, V. (2009). Adult stem cell plasticity: neoblast repopulation in non-lethally irradiated  
760 planarians. *Dev. Biol.* *328*, 305–314.
- 761 43. Wang, I.E., Wagner, D.E., and Reddien, P.W. (2018). Clonal Analysis of Planarian Stem Cells by  
762 Subtotal Irradiation and Single-Cell Transplantation. *Methods Mol. Biol.* *1774*, 479–495.
- 763 44. Steele, V.E., and Lange, C.S. (1976). Effects of irradiation on stem cell response to differentiation  
764 inhibitors in the planarian *Dugesia etrusca*. *Radiat. Res.* *67*, 21–29.

- 765 45. Hayashi, T., Asami, M., Higuchi, S., Shibata, N., and Agata, K. (2006). Isolation of planarian X-ray-  
766 sensitive stem cells by fluorescence-activated cell sorting. *Dev. Growth Differ.* *48*, 371–380.
- 767 46. LoCascio, S.A., Lapan, S.W., and Reddien, P.W. (2017). Eye Absence Does Not Regulate Planarian  
768 Stem Cells during Eye Regeneration. *Dev. Cell* *40*, 381-391.e3.
- 769 47. Petersen, C.P., and Reddien, P.W. (2008). Smed-betacatenin-1 is required for anteroposterior  
770 blastema polarity in planarian regeneration. *Science* *319*, 327–330.
- 771 48. Gaviño, M.A., and Reddien, P.W. (2011). A Bmp/Admp regulatory circuit controls maintenance  
772 and regeneration of dorsal-ventral polarity in planarians. *Curr. Biol.* *21*, 294–299.
- 773 49. Wurtzel, O., Oderberg, I.M., and Reddien, P.W. (2017). Planarian Epidermal Stem Cells Respond  
774 to Positional Cues to Promote Cell-Type Diversity. *Dev. Cell* *40*, 491-504.e5.
- 775 50. Tasaki, J., Shibata, N., Nishimura, O., Itomi, K., Tabata, Y., Son, F., Suzuki, N., Araki, R., Abe, M.,  
776 Agata, K., *et al.* (2011). ERK signaling controls blastema cell differentiation during planarian  
777 regeneration. *Development* *138*, 2417–2427.
- 778 51. Fan, Y., Chai, C., Li, P., Zou, X., Ferrell, J.E., and Wang, B. (2023). Ultrafast distant wound response  
779 is essential for whole-body regeneration. *Cell* *186*, 3606-3618.e16.
- 780 52. Wurtzel, O., Cote, L.E., Poirier, A., Satija, R., Regev, A., and Reddien, P.W. (2015). A Generic and  
781 Cell-Type-Specific Wound Response Precedes Regeneration in Planarians. *Dev. Cell* *35*, 632–645.
- 782 53. Rouhana, L., Weiss, J.A., Forsthoefel, D.J., Lee, H., King, R.S., Inoue, T., Shibata, N., Agata, K., and  
783 Newmark, P.A. (2013). RNA interference by feeding in vitro-synthesized double-stranded RNA to  
784 planarians: methodology and dynamics. *Dev. Dyn.* *242*, 718–730.
- 785 54. King, R.S., and Newmark, P.A. (2013). In situ hybridization protocol for enhanced detection of  
786 gene expression in the planarian *Schmidtea mediterranea*. *BMC Dev. Biol.* *13*, 8.
- 787 55. King, R.S., and Newmark, P.A. (2018). Whole-Mount In Situ Hybridization of Planarians. *Methods*  
788 *Mol. Biol.* *1774*, 379–392.
- 789 56. Choi, H.M.T., Schwarzkopf, M., Fornace, M.E., Acharya, A., Artavanis, G., Stegmaier, J., Cunha, A.,  
790 and Pierce, N.A. (2018). Third-generation in situ hybridization chain reaction: multiplexed,  
791 quantitative, sensitive, versatile, robust. *Development* *145*.
- 792 57. Wenemoser, D., and Reddien, P.W. (2010). Planarian regeneration involves distinct stem cell  
793 responses to wounds and tissue absence. *Dev. Biol.* *344*, 979–991.
- 794 58. Rueden, C.T., Schindelin, J., Hiner, M.C., DeZonia, B.E., Walter, A.E., Arena, E.T., and Eliceiri, K.W.  
795 (2017). ImageJ2: ImageJ for the next generation of scientific image data. *BMC Bioinformatics* *18*,  
796 529.
- 797 59. Pellettieri, J. (2010). Cell death and tissue remodeling in planarian regeneration. *Dev Biol.*
- 798 60. Drevon, D., Fursa, S.R., and Malcolm, A.L. (2017). Intercoder reliability and validity of  
799 webplotdigitizer in extracting graphed data. *Behav. Modif.* *41*, 323–339.
